# Supplementary material for: Cross-cultural validation of health literacy measurement tools in Italian oncology patients
Source: PubMed Central journal article supplement (PMC5477151; doi:10.1186/s12913-017-2359-0), 2017-06-19
Supplement: 12913_2017_2359_MOESM3_ESM.pdf [file 12913_2017_2359_MOESM3_ESM.pdf]

## **Single question on Self-rated Reading Ability – I**

Domanda di autovalutazione della capacità di lettura

(K. M. Jeppesen et al. 2009; versione Italiana 2016)

### **1. Come valuta la sua capacità di leggere?**

Possibili risposte:

1. molto buona, o ottima
2. buona
3. discreta
4. scarsa
5. molto scarsa, o pessima
