# Supplementary material for: Cross-cultural validation of health literacy measurement tools in Italian oncology patients
Source: Springer Nature journal article supplement (doi:10.1186/s12913-017-2359-0), 2017-06-19
Supplement: MOESM2 [file 12454732]

## **SINGLE ITEM LITERACY SCREENER – I**

(N. S. Morrys et al. 2006; versione Italiana 2016)

1. **Quanto spesso lei ha bisogno che qualcuno la aiuti quando legge istruzioni, opuscoli o altro materiale scritto di argomento sanitario?**

Possibili risposte:

1. mai
2. raramente
3. ogni tanto
4. spesso
5. sempre
