# Supplementary material for: Cross-cultural validation of health literacy measurement tools in Italian oncology patients
Source: Springer Nature journal article supplement (doi:10.1186/s12913-017-2359-0), 2017-06-19
Supplement: MOESM4 [file 12454732]

1.

## Eritrocina

600 mg

12 compresse

Prendere una compressa per bocca ogni 8 ore.

Domanda: Se prende la prima compressa alle 7:00 di mattina, quando deve prendere la compressa successiva?

*risposta esatta: 'alle 15:00' / 'alle 3 del pomeriggio'*

2.

Il livello normale di zucchero nel sangue a digiuno è inferiore a 126.

Il Suo livello di zucchero nel sangue oggi a digiuno è pari a 136.

Domanda: Se il suo valore a digiuno fosse questo, il suo livello di zucchero nel sangue sarebbe normale oggi?

*risposta esatta: 'no' / 'non normale'*

3.

APPUNTAMENTO

REPARTO: Diabetologia

POSIZIONE: terzo piano

GIORNO: Giovedì

DATA: 2 aprile

ORE: 10.20

DEVE PORTARE CON SÉ LA SUA TESSERA SANITARIA

Domanda: Quand'è il Suo prossimo appuntamento?

risposta esatta: '2 aprile' / 'Giovedì, 2 aprile'

4.

## Levodopa + Benserazide

200 mg + 50 mg

50 compresse

Prendere una compressa a stomaco vuoto, 30 minuti prima dei pasti o un'ora dopo i pasti.

Domanda: Se pranza alle 12.00 e ha intenzione di prendere la compressa dopo pranzo, a che ora deve prenderla?

risposta esatta: 'alle 13:00' / 'dopo le 13:00'
