# Supplementary material for: Cross-cultural validation of health literacy measurement tools in Italian oncology patients
Source: Springer Nature journal article supplement (doi:10.1186/s12913-017-2359-0), 2017-06-19
Supplement: MOESM5 [file 12454732]

## **S-TOFHLA - Reading**

(R. M. Parker et al. 1995; versione Italiana 2016)

A.

Il Suo medico l'ha mandata a fare una radiografia \_\_\_\_\_.

- a. allo stomaco
- b. al diabete
- c. ai punti
- d. ai germi

Lei deve avere lo stomaco \_\_\_\_\_ quando viene per fare la \_\_\_\_\_.

|             |                |
|-------------|----------------|
| a. asmatico | a. calligrafia |
| b. vuoto    | b. tipologia   |
| c. incesto  | c. ortografia  |
| d. anemico  | d. radiografia |

La radiografia \_\_\_\_\_ da 1 a 3 \_\_\_\_\_ per essere fatta.

|                 |          |
|-----------------|----------|
| a. richiederà   | a. letti |
| b. visualizzerà | b. teste |
| c. ripeterà     | c. ore   |
| d. guarderà     | d. diete |

## IL GIORNO PRIMA DELLA RADIOGRAFIA.

Per cena, mangi solo \_\_\_\_\_ quantità di frutta, \_\_\_\_\_ e marmellata,

- |                |          |
|----------------|----------|
| a. una piccola | a. pale  |
| b. un brodo    | b. panno |
| c. un attacco  | c. pane  |
| d. una nausea  | d. pari  |

con caffè o tè.

Dopo \_\_\_\_\_, Lei non deve \_\_\_\_\_ o bere

- |               |             |
|---------------|-------------|
| a. minuto     | a. mandare  |
| b. mezzanotte | b. mangiato |
| c. durante    | c. bevuto   |
| d. prima      | d. mangiare |

assolutamente \_\_\_\_\_ fino a dopo aver \_\_\_\_\_ la radiografia.

- |           |          |
|-----------|----------|
| a. mente  | a. sei   |
| b. niente | b. fai   |
| c. ogni   | c. fatto |
| d. gente  | d. era   |

## IL GIORNO DELLA RADIOGRAFIA.

Non mangi a \_\_\_\_\_ .

- a. appuntamento
- b. ambulatorio
- c. colazione
- d. clinica

Non \_\_\_\_\_ , neanche \_\_\_\_\_ .

- |          |            |
|----------|------------|
| a. beffi | a. cuore   |
| b. beva  | b. respiro |
| c. bendi | c. acqua   |
| d. balli | d. cancro  |

Se ha qualche \_\_\_\_\_ , chiami \_\_\_\_\_ di Radiologia al numero 02 923111.

- |              |                    |
|--------------|--------------------|
| a. risposta  | a. il reparto      |
| b. esercizio | b. la distorsione  |
| c. apparato  | c. la farmacia     |
| d. domanda   | d. il mal di denti |

B.

Dichiaro di fornire informazioni corrette per \_\_\_\_\_ se ho diritto all'Esenzione

- a. capelli
- b. vestire
- c. valutare
- d. dolore

dal ticket.

Io \_\_\_\_\_ di fornire all'Azienda Sanitaria le informazioni per \_\_\_\_\_

- |             |               |
|-------------|---------------|
| a. dichiaro | a. nascondere |
| b. esploro  | b. rischiare  |
| c. invio    | c. rilasciare |
| d. ottengo  | d. verificare |

qualsiasi dichiarazione fornita in questo \_\_\_\_\_ e autorizzo

- a. enfisema
- b. modulo
- c. fegato
- d. globulo

\_\_\_\_\_ ad effettuare eventuali controlli. Sono \_\_\_\_\_ che

- |                        |                |
|------------------------|----------------|
| a. l'inflammatione     | a. studioso    |
| b. la religione        | b. divertito   |
| c. il ferro            | c. consapevole |
| d. l'Azienda Sanitaria | d. stabilito   |

dovrò segnalare all'Azienda Sanitaria qualsiasi \_\_\_\_\_ nella mia situazione

- a. cambiamento
- b. ormone
- c. antiacido
- d. caricamento

entro \_\_\_\_\_ (10) giorni da quando \_\_\_\_\_ il cambiamento stesso.

- |           |              |
|-----------|--------------|
| a. tre    | a. avvelena  |
| b. uno    | b. avviene   |
| c. cinque | c. avvilisce |
| d. dieci  | d. avviti    |

Sono consapevole \_\_\_\_\_ se **NON** condivido la \_\_\_\_\_ presa nel mio

- |        |                |
|--------|----------------|
| a. qui | a. coniugale   |
| b. cui | b. occupazione |
| c. che | c. adulta      |
| d. chi | d. decisione   |

caso dall'Azienda Sanitaria, in seguito ad un controllo, ho \_\_\_\_\_ ad un colloquio.

- a. diretto
- b. rovescio
- c. curvo
- d. diritto

Posso \_\_\_\_\_ il colloquio scrivendo o \_\_\_\_\_ all'Azienda Sanitaria.

- |               |                  |
|---------------|------------------|
| a. richiedere | a. tergiversando |
| b. rifiutare  | b. leggendo      |
| c. omettere   | c. telefonando   |
| d. aggiustare | d. odorando      |

Se Lei \_\_\_\_\_ l'esenzione dal ticket per un \_\_\_\_\_ della famiglia,

- |            |            |
|------------|------------|
| a. vuota   | a. membro  |
| b. vuole   | b. storia  |
| c. copre   | c. peso    |
| d. disegna | d. cintura |

dovrà compilare e \_\_\_\_\_ un altro modulo. \_\_\_\_\_ , utilizzeremo

- a. rilassare
- b. rompere
- c. inalare
- d. firmare

- a. Da
- b. Se
- c. Tuttavia
- d. Poiché

\_\_\_\_\_ presente su questo modulo per stabilire la Sua \_\_\_\_\_ .

- a. il polmone
- b. la data
- c. il pasto
- d. il pelvico

- a. ipoglicemia
- b. idoneità
- c. osteoporosi
- d. schizofrenia
